# Supplementary material for: Ultrafast Cancer Cells Imaging for Liquid Biopsy via Dynamic Self-Assembling Fluorescent Nanoclusters
Source: MDPI journal article supplement (doi:10.3390/bios13060602), 2023-05-31
Supplement: s1 [file s1]

---

## Supporting information

# Ultrafast Cancer Cells Imaging for Liquid Biopsy via Dynamic Self-Assembling Fluorescent Nanocluster

Jinpeng Wang<sup>1,#</sup>, Qingxiu Xia<sup>2,#</sup>, Ke Huang,<sup>1</sup> Lihong Yin<sup>2</sup>, Hui Jiang<sup>1</sup>, Xiaohui Liu<sup>1\*</sup>, Xuemei Wang<sup>1\*</sup>

<sup>1</sup>*State Key Laboratory of Digital Medical Engineering, School of Biological Science and Medical Engineering, Southeast University, Nanjing 210096, China.*

<sup>2</sup>*Key Laboratory of Environmental Medicine Engineering of Ministry of Education, School of Public Health, Southeast University, Nanjing 210009, China.*

<sup>#</sup> Contributed equally.

\*Correspondence: 101013182@seu.edu.cn (X.H. Liu); xuewang@seu.edu.cn (X.M. Wang)

---

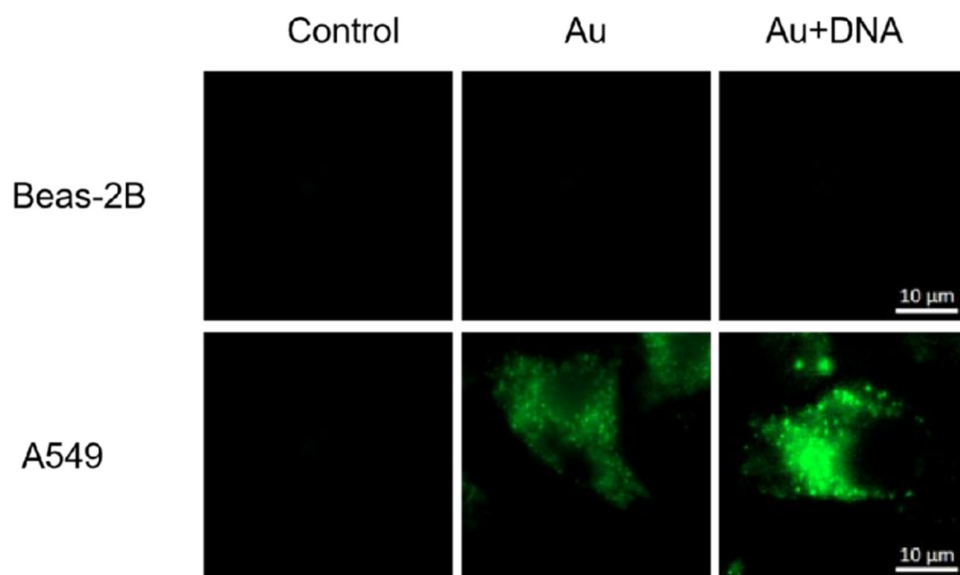

Figure S1. Dynamic self-assembly of fluorescent nanoclusters in Beas-2B and A549 cell lines.

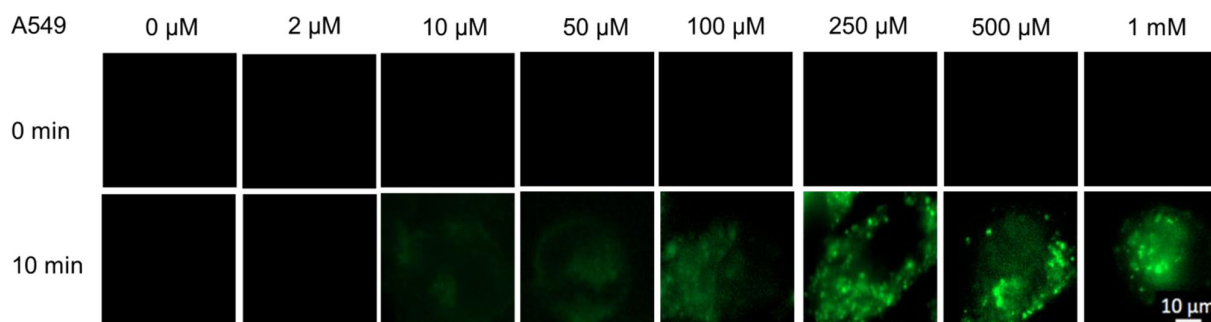

Figure S2. Optimization of experimental conditions based on different concentrations of chloroauric acid in A549 23 cell lines.

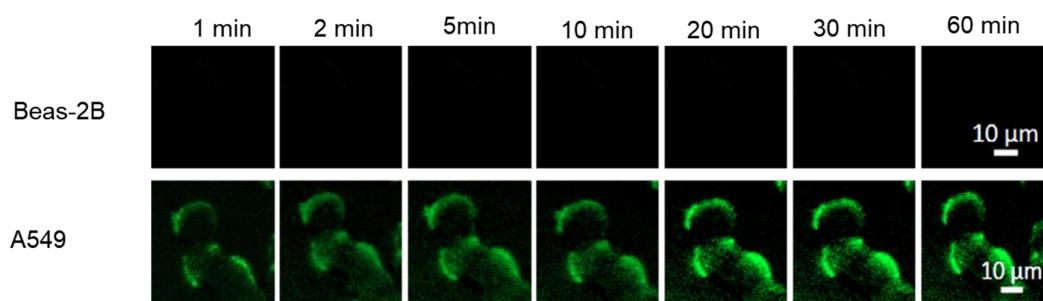

Figure S3. Self-assembly of fluorescent nanoclusters from 1 min to 60 min in Beas-2B and A549 cell lines.

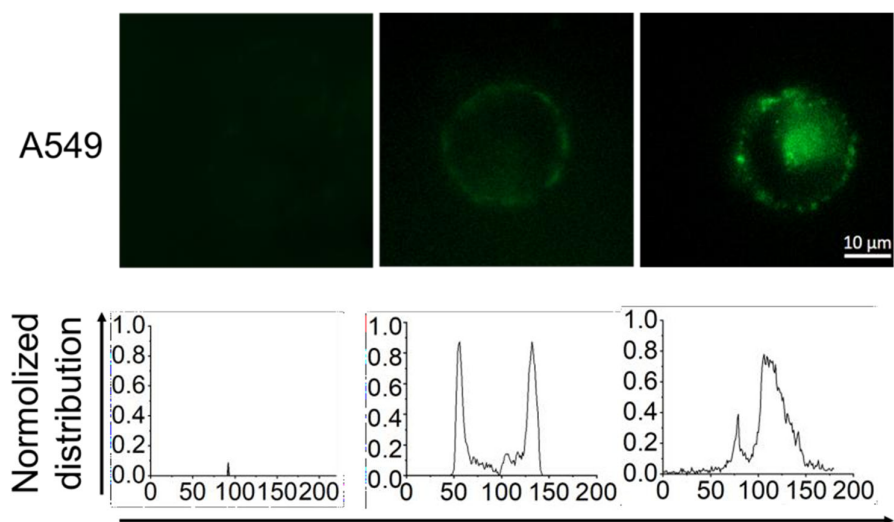

Figure S4. Fluorescence images of dynamically self-assembled fluorescent nanoclusters in A549 cells in the state of suspension.

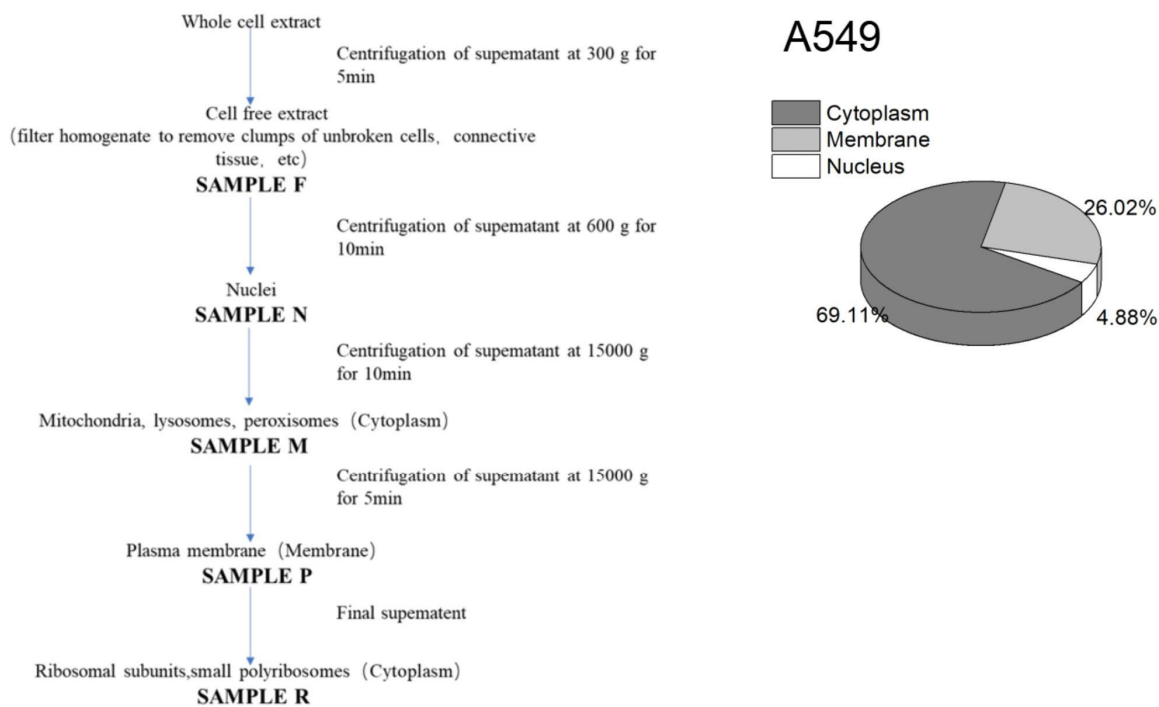

Figure S5. Characterization of dynamic self-assembled nanofluorescent cluster distribution on subcellular 35 organelles in A549 cell line.

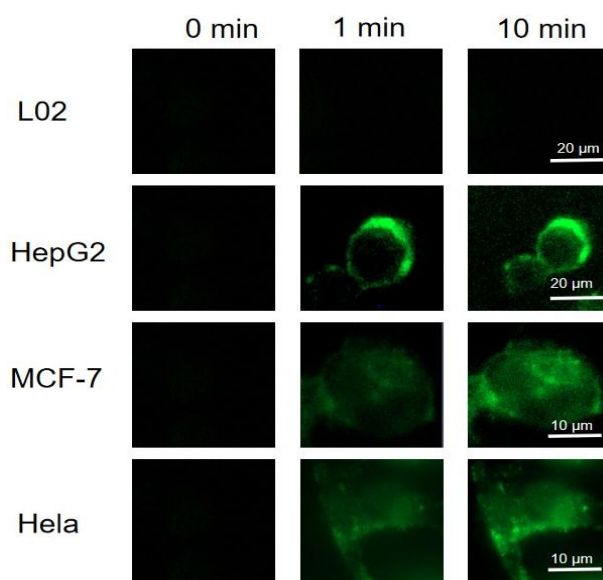

Figure S6. Self-assembly of fluorescent nanoclusters in L02, HepG2, MCF-7, HeLa cell lines.
